# Supplementary material for: microRNA-363-3p reduces endothelial cell inflammatory responses in coronary heart disease via inactivation of the NOX4-dependent p38 MAPK axis
Source: publisher site journal article supplement (doi:10.18632/aging.202721), 2021-03-19
Supplement: Supplementary file [file aging-v13i8-202721-supplementary-material-SD1.pdf]

## SUPPLEMENTARY TABLE

**Supplementary Table 1. pmirGLO vector multiple cloning site.**

---

| <b>SV40 late poly(A) signal</b>             |           |
|---------------------------------------------|-----------|
| SV40 early enhancer/promotor                | 106–327   |
| hRluc-neo fusion protein coding region      | 426–844   |
| Synthetic polyadenylation signal            | 889–2664  |
| $\beta$ -lactamase (Ampr) coding region     | 2728–2776 |
| ColE1-derived plasmid origin of replication | 3037–3897 |
| Human phosphoglycerate kinase promoter      | 4052–4088 |
| 5094–5609                                   |           |
| luc2 reporter gene                          | 5645–7297 |
| Multiple cloning site (MCS, Figure 1)       | 7306–7350 |

---

Information of pmirGLO Vector was achieved from <https://www.promega.com.cn/Products/Reporter-Assays-and-Transfection/Reporter-Vectors-and-Cell-Lines/pmirGLO-Dual-Luciferase-miRNA-Target-Expression-Vector/?catNum=E1330>
